# Supplementary material for: LunX-CAR T Cells as a Targeted Therapy for Non-Small Cell Lung Cancer
Source: PubMed Central journal article supplement — Mol Ther Oncolytics. 2020 Apr 21;17:361–70. doi: 10.1016/j.omto.2020.04.008 (PMC7210386; doi:10.1016/j.omto.2020.04.008), 2020-04-21
Supplement: mmc1.pdf [file mmc1.pdf]

**OMTO, Volume 17**

**Supplemental Information**

**LunX-CAR T Cells as a Targeted Therapy  
for Non-Small Cell Lung Cancer**

**Ziming Hu, Xiaohu Zheng, Defeng Jiao, Yonggang Zhou, Rui Sun, Baolong Wang, Zhigang Tian, and Haiming Wei**

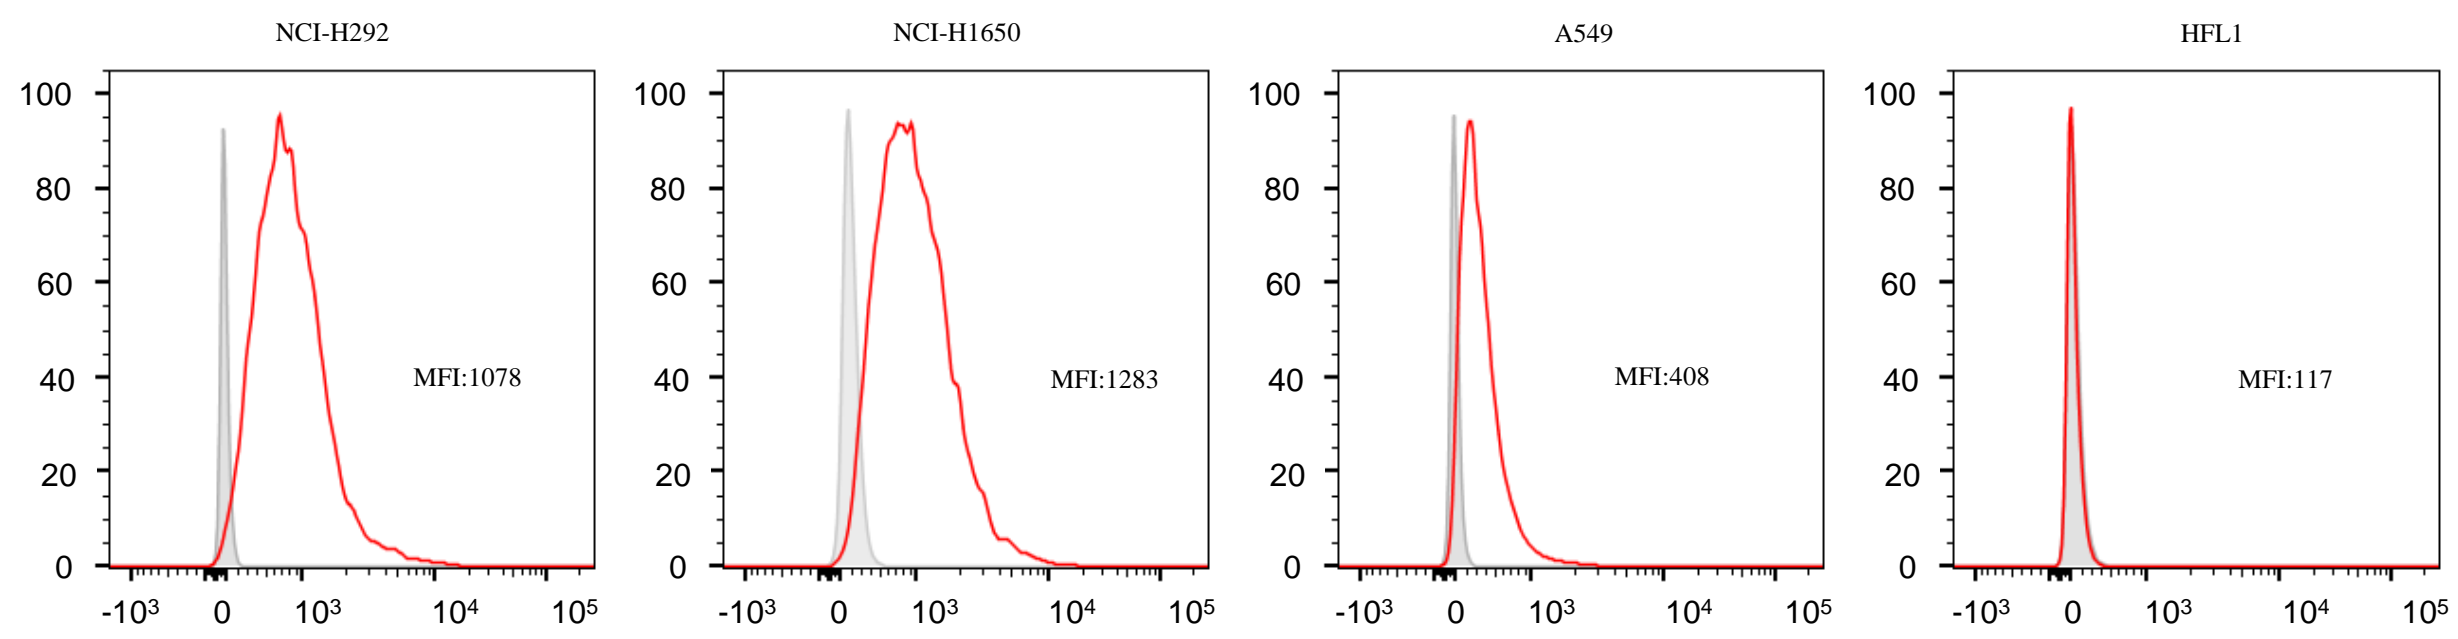

Figure S1. Flow cytometric staining for LUNX (anti-LUNX, S-35-8) on cell membranes of NCI-H292, NCI-H1650, A549, and HFL1 cells (no perforation).

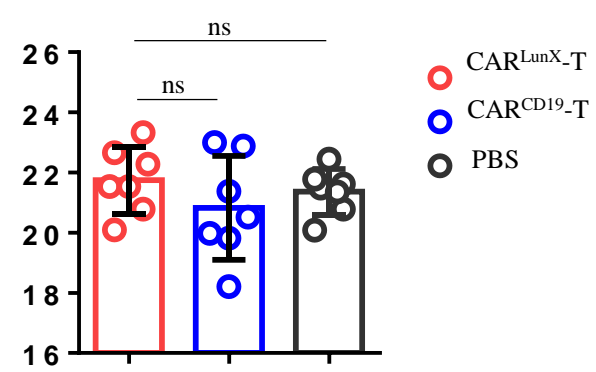

Figure S2. Statistical analyses of the body weight of mice from CAR<sup>LunX</sup> T cell, CAR<sup>CD19</sup> T cell, and PBS treatment groups. *P* values were obtained using one-way ANOVA followed by Tukey's multiple-comparisons test.

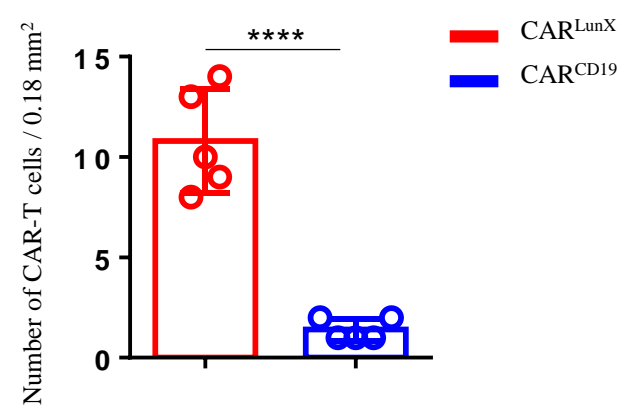

Figure S3. Statistical analysis of numbers of infiltrating CAR-T cells in immunofluorescence images of A549 metastasis xenografted mice model. Each dot represents the 0.18mm<sup>2</sup> area of sample.

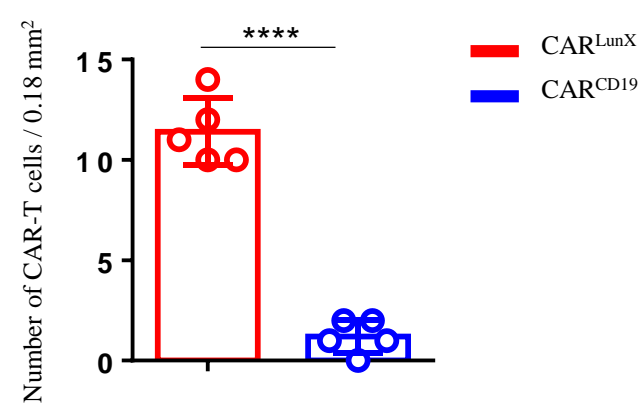

Figure S4. Statistical analysis of numbers of infiltrating CAR-T cells in immunofluorescence images of PDX mice model. Each dot represents the 0.18mm<sup>2</sup> area of sample.
